# Supplementary material for: Shape-controlled synthesis of 3D copper nicotinate hollow microstructures and their catalytic properties
Source: Royal Society of Chemistry journal article supplement (doi:10.1039/c5ra25556b), 2016-01-01
Supplement: c5ra25556b1.pdf [file c5ra25556b1.pdf]

## Supplementary Information

### Shape-controlled synthesis of 3D copper nicotinate hollow microstructures and their catalytic properties

Shanshan Fu,<sup>a</sup> Qingdong Xia,<sup>a</sup> Shuang Li,<sup>a</sup> Guojuan Ren,<sup>a</sup> Fang Chai,<sup>\*a</sup> Chungang Wang<sup>\*b</sup> and Fengyu Qu<sup>\*a</sup>

†<sup>a</sup> Key Laboratory of Design and Synthesis of Functional Materials and Green Catalysis, Colleges of Heilongjiang Province, Harbin Normal University, Harbin 150025, P. R. China.  
E-mail: fangchai@gmail.com, [qufengyu@hrbnu.edu.cn](mailto:qufengyu@hrbnu.edu.cn)

<sup>b</sup> Faculty of Chemistry, Northeast Normal University, Changchun, 130024, P.R. China.  
E-mail: [wangcg925@nenu.edu.cn](mailto:wangcg925@nenu.edu.cn)

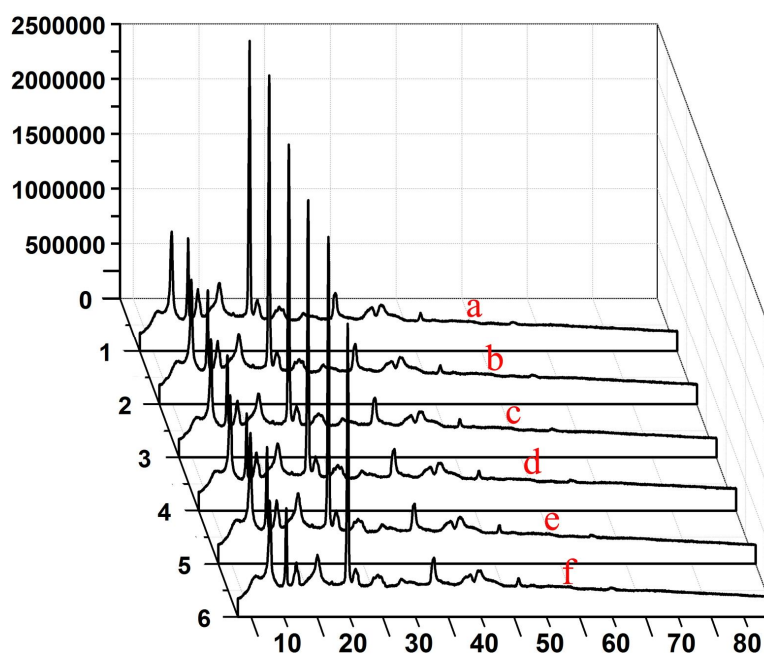

**Fig. S1** XRD pattern of copper nicotinate hollow microstructures with different a. 1 min, b. 5 min, c. 10 min, d. 20 min, e. 30 min, f. 40 min.

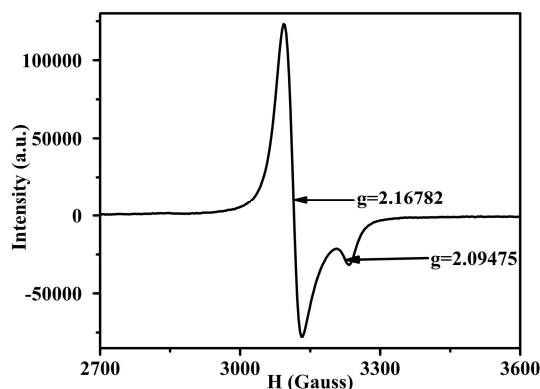

**Fig. S2** EPR experimental spectra at 100 K of copper nicotinate solutions in ethanol with concentration of 0.1 M. In the experiment, a Bruker ESRA-300 spectrometer operating at 9.45 GHz (X band) at 100 K was used to take EPR data of the samples in a quartz capillary tube.

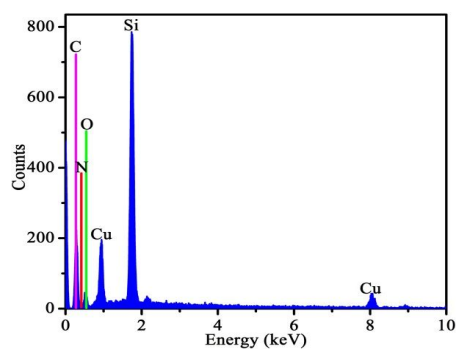

**Fig. S3** EDX spectrum of Copper nicotinate hollow microstructures (0.20 M nicotinic acid).

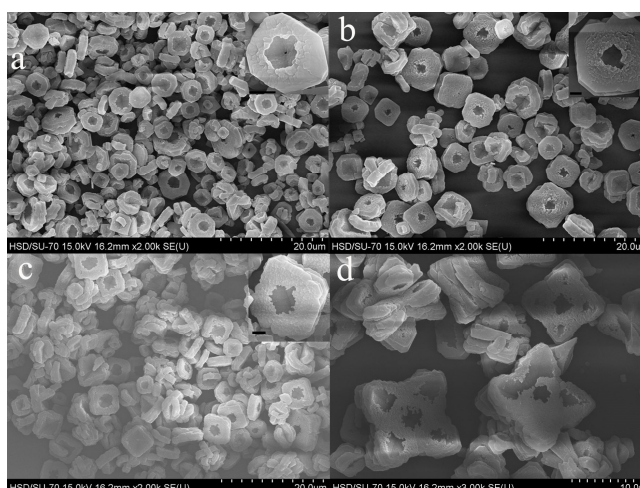

**Fig. S4** Representative SEM images of copper nicotinate reaction of 30 min with various concentrations: (a) 0.10 M, (b) 0.15 M, (c) 0.20 M, (d) 0.30 M. (Inset is magnified images, scaleplate: 1  $\mu$ m)

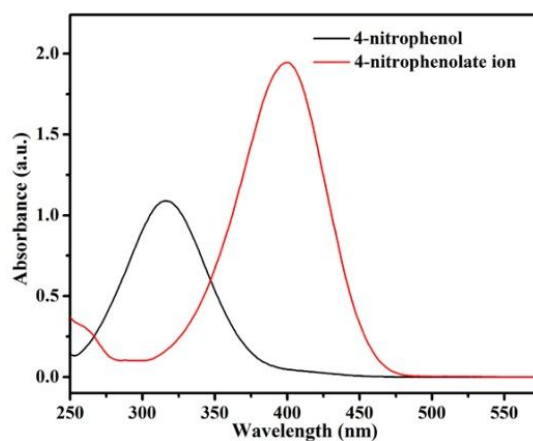

**Fig. S5** The UV-vis characteristic peaks of freshly prepared 4-nitrophenol and 4-nitrophenolate ion aqueous solution at 317 and 400 nm, respectively.

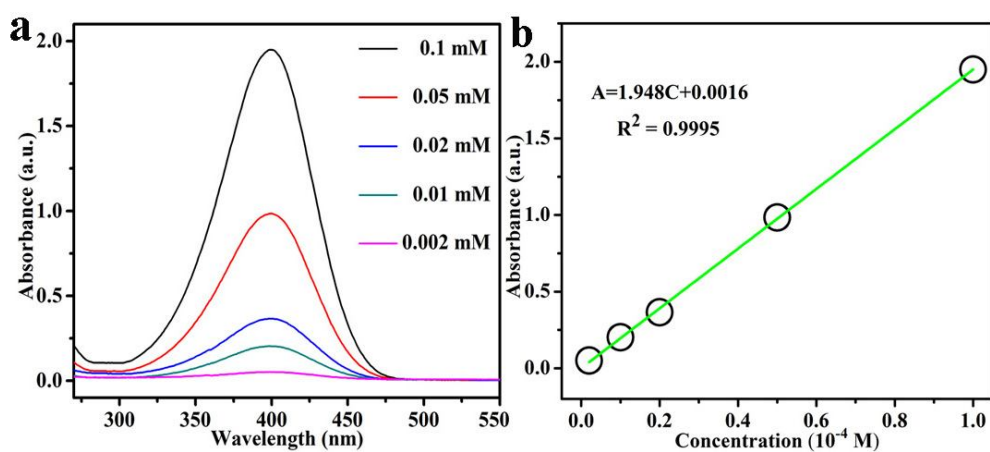

**Fig. S6** (a) Absorption spectra of aqueous mixture solutions of 4-NP and  $\text{NaBH}_4$  at different concentrations of 4-NP. (b) Plot of the peak absorbance against the concentration of 4-NP.

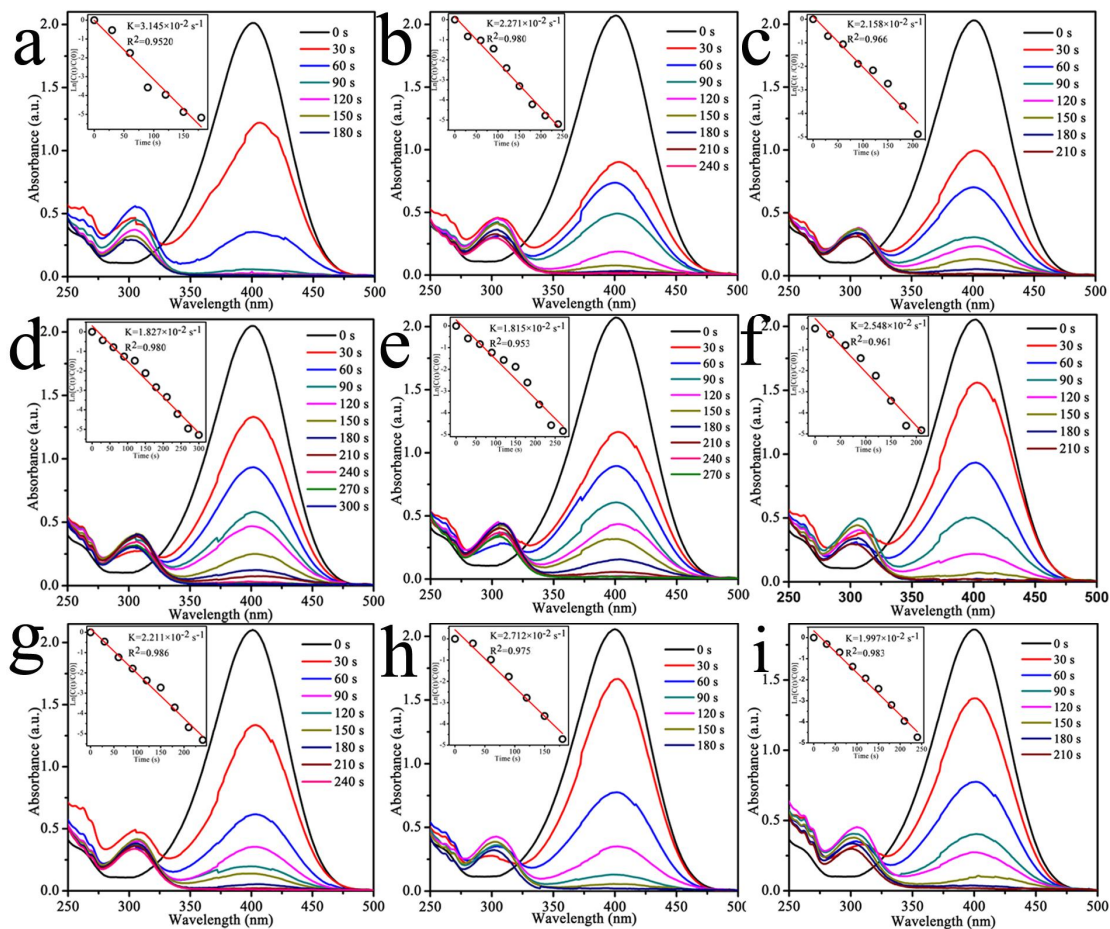

**Fig. S7** UV-vis absorption spectra of reduction of 4-NP by  $\text{NaBH}_4$  under the catalysis of copper nicotinate (0.20 M) with different reaction time (a) 1 min, (b) 3 min, (c) 5 min, (d) 8 min, (e) 10 min, (f) 15 min, (g) 20 min, (h) 40 min, (i) 70 min. (insets: the corresponding  $\ln(C_t/C_0)$  versus reaction time for reduction of 4-NP.)

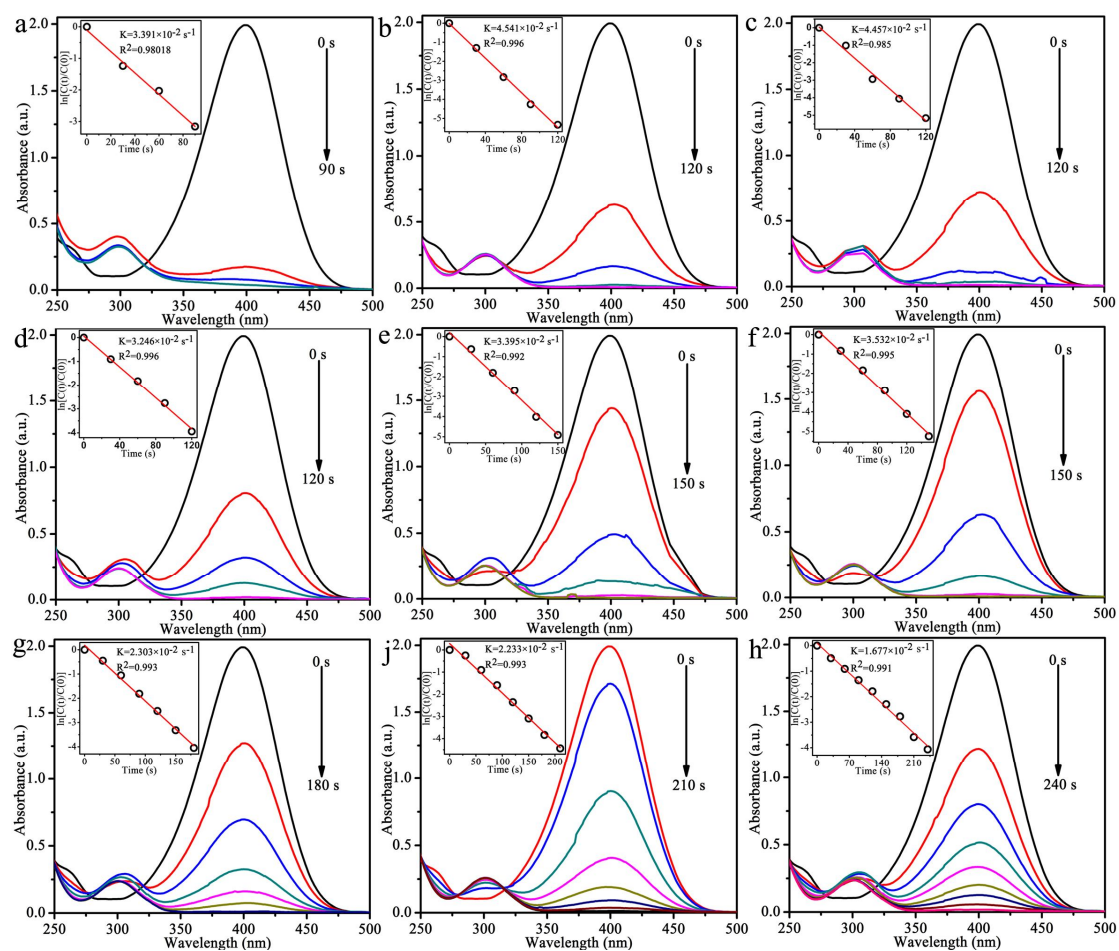

**Fig. S8** UV-vis spectra of the reduction of 4-NP by  $\text{NaBH}_4$  in the presence of copper nicotinate recorded for the 2<sup>nd</sup> (a), 3<sup>rd</sup> (b), 4<sup>th</sup> (c), 5<sup>th</sup> (d), 6<sup>th</sup> (e), 7<sup>th</sup> (f), 8<sup>th</sup> (g), 9<sup>th</sup> (j), 10<sup>th</sup> (h), insets: the corresponding  $\ln(C(t)/C(0))$  versus reaction time for reduction of 4-NP.

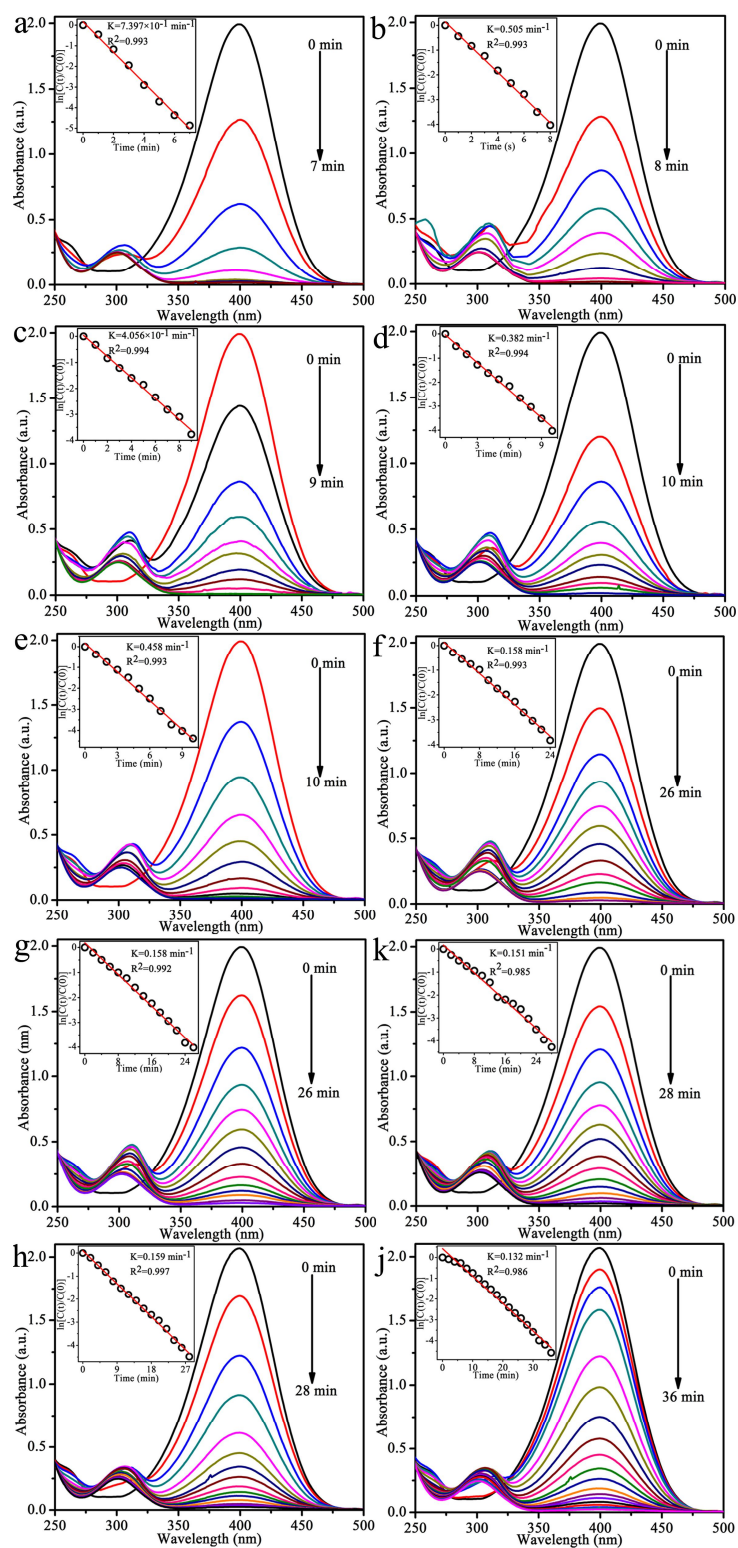

**Fig. S9** UV-vis spectra of the reduction of 4-NP by  $\text{NaBH}_4$  in the presence of copper nicotinate recorded for the 11th (a), 12th (b), 13th (c), 14th (d), 15th (e), 16th (f), 17th (g), 18th (k), 19th (h), 20th (j), insets: the corresponding  $\ln(C(t)/C(0))$  versus reaction time for reduction of 4-NP.

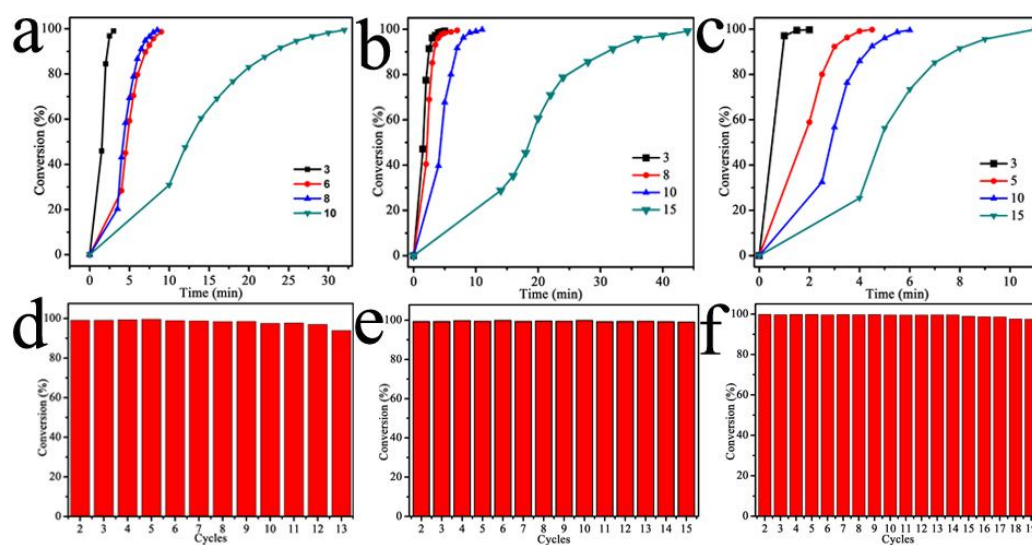

**Fig. S10** Conversion (%) of 4-NP with the change of time by copper nicotinate as catalyst with various concentrations nicotinic acid (a) 0.10 M, (b) 0.15 M, (c) 0.30 M. The reusability of copper nicotinate as a catalyst for the reduction of 4-NP with  $\text{NaBH}_4$  (d), (e), (f).

**Table S1** Comparison of pseudo-first-order rate constants for 4-NP reduction by copper nicotinate

| Catalyst                             | Type                      | Initial concentration of the 4-NP | Final amount of catalyst | Rate constant                         | References |
|--------------------------------------|---------------------------|-----------------------------------|--------------------------|---------------------------------------|------------|
| copper nicotinate                    | hollow microstructures    | $1.09 \times 10^{-4}$ M           | 0.00916 mg/mL            | $2.999 \times 10^{-2} \text{ s}^{-1}$ | This work  |
| Cu nanoparticles                     | nanoparticles             | $0.6 \times 10^{-4}$ M            | 0.25 mg/mL               | $0.159 \times 10^{-2} \text{ s}^{-1}$ | 1          |
| CuO nanostructures                   | Flowerlike nanostructures | $1.0 \times 10^{-4}$ M            | 0.01 mg/mL               | $1.06 \times 10^{-2} \text{ s}^{-1}$  | 2          |
| PANI/Ag                              | composites                | $0.93 \times 10^{-4}$ M           | 0.333 mg/mL              | $2.56 \times 10^{-2} \text{ s}^{-1}$  | 3          |
| Fe <sub>3</sub> O <sub>4</sub> @C@Ag | Supported                 | $0.099 \times 10^{-4}$ M          | 0.00495 mg/mL            | $0.372 \times 10^{-2} \text{ s}^{-1}$ | 4          |

#### Reference:

- (1) P. Deka, R. C. Deka and P. Bharali, *New J. Chem.*, **2014**, *38*, 1789-1793.
- (2) Wei. Che, Y. H. Ni, Y. X. Zhang and Y. Ma, *Journal of Physics and Chemistry of Solids*, **2015**, *77*, 1-7.
- (3) B. Ma, M. Wang, D. Tian, Y. Y. Pei and L. J. Yuan, *RSC Adv.*, **2015**, *5*, 41639-41645.
- (4) Q. An, M. Yu, Y. Zhang, W. Ma, J. Guo, C. Wang, *J. Phys. Chem. C*, **2012**, *116*, 22432-22400.
